# Supplementary material for: New bis-, tris- and tetrakis(pyrazolyl)borate ligands with 3-pyridyl and 4-pyridyl substituents: synthesis and coordination chemistry
Source: Royal Society of Chemistry journal article supplement (doi:10.1039/b502892b), 2005-01-01
Supplement: b502892b.pdf [file b502892b.pdf]

# New third-generation bis-, tris- and tetrakis(pyrazolyl)borate ligands with 3-pyridyl and 4-pyridyl substituents: synthesis and coordination chemistry

Harry Adams, Stuart R. Batten, Graham M. Davies, Martin B. Duriska, John C. Jeffery, Paul Jensen, Jinzhen Lu, Graham R. Motson, Simon J. Coles, Michael B. Hursthouse and Michael D. Ward

## Electronic Supporting Information

(Table S1 and Figures S1 – S6)

**Table S1.** Hydrogen bond details for 3-(3-pyridyl)pyrazole (two polymorphs) and 3-(4-pyridyl)pyrazole.<sup>a</sup>

|                                           | N-H (Å) | (N)H...N (Å) | N...N (Å) | N-H...N (°) |
|-------------------------------------------|---------|--------------|-----------|-------------|
| <b>3-(3-pyridyl)pyrazole polymorph I</b>  |         |              |           |             |
| N10-H1...N2 <sup>i</sup>                  | 1.19(3) | 1.66(3)      | 2.840(3)  | 167(2)      |
|                                           |         |              |           |             |
| <b>3-(3-pyridyl)pyrazole polymorph II</b> |         |              |           |             |
| N2-H2...N108                              | 0.94(2) | 1.96(2)      | 2.892(3)  | 169(2)      |
| N102-H102...N8 <sup>ii</sup>              | 1.00(2) | 1.85(2)      | 2.852(3)  | 170(2)      |
|                                           |         |              |           |             |
| <b>3-(4-pyridyl)pyrazole</b>              |         |              |           |             |
| N2-H2...N9 <sup>iii</sup>                 | 0.91(2) | 2.04(2)      | 2.899(2)  | 158(2)      |
|                                           |         |              |           |             |

<sup>a</sup> Symmetry operations: (i): x, y-1, z; (ii): x+1, y-1, z; (iii): x-1, 1/2-y, z+1/2.

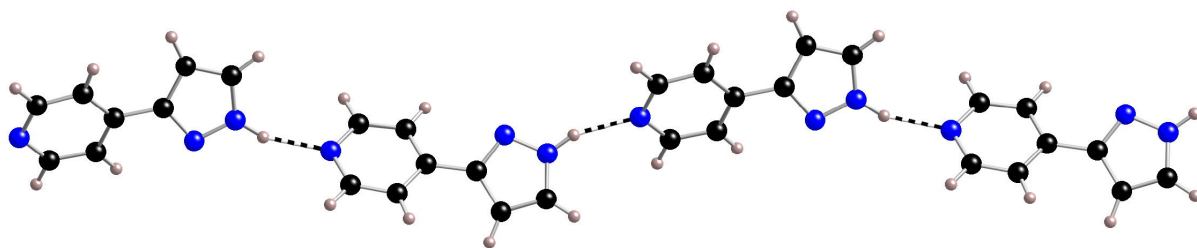

**Figure S1.** Hydrogen bonded chains in the structure of (a) 3-(4-pyridyl)pyrazole. Hydrogen bonds are shown by the striped bonds.

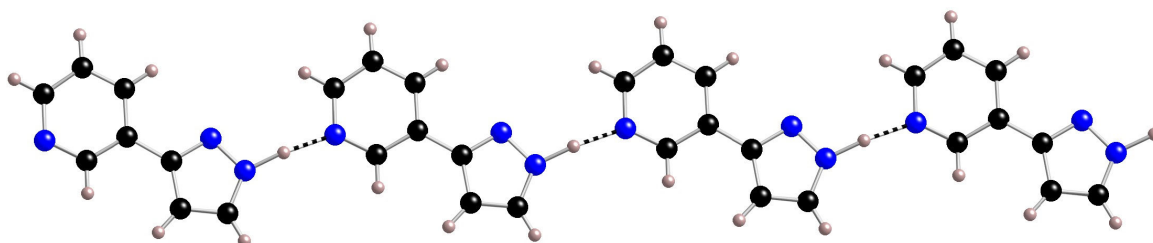

**Figure S2.** Hydrogen bonded chains in the structure of (a) 3-(3-pyridyl)pyrazole, polymorph I. Hydrogen bonds are shown by the striped bonds.

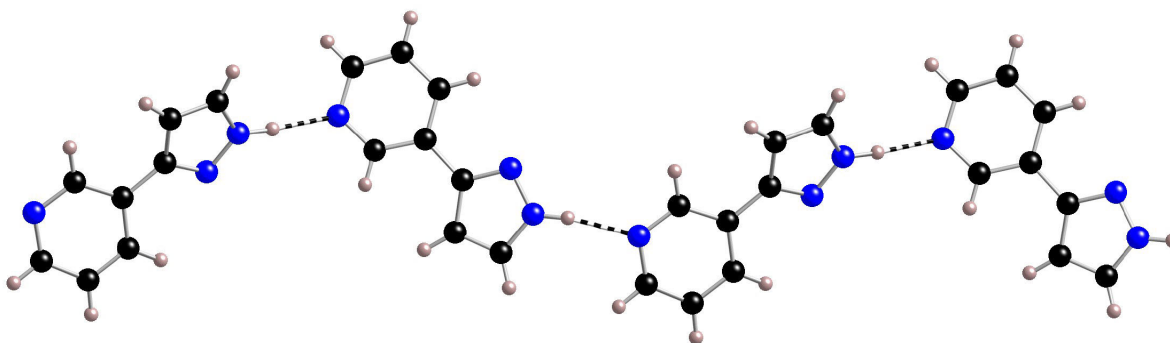

**Figure S3.** Hydrogen bonded chains in the structure of 3-(3-pyridyl)pyrazole, polymorph II. Hydrogen bonds are shown by the striped bonds.

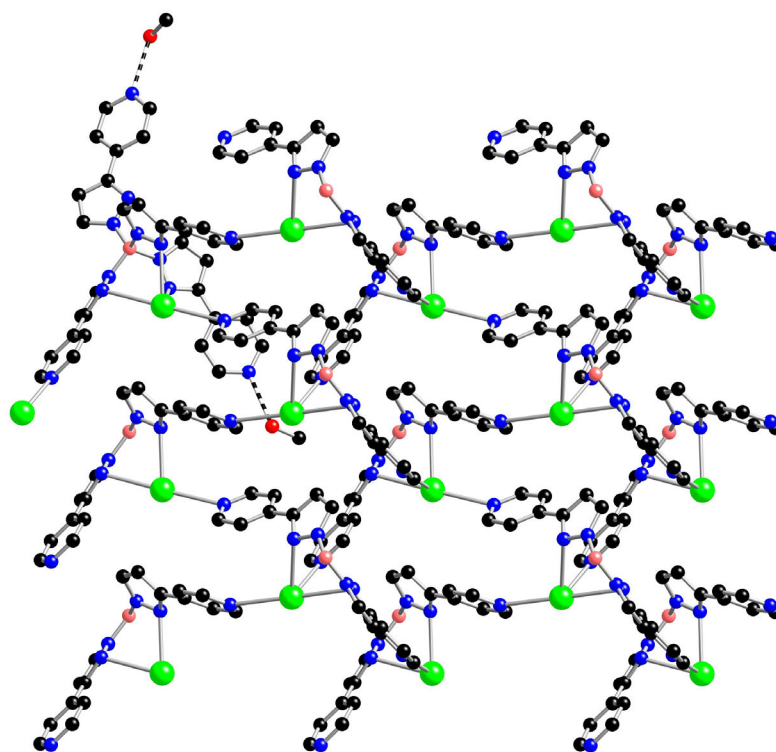

(a)

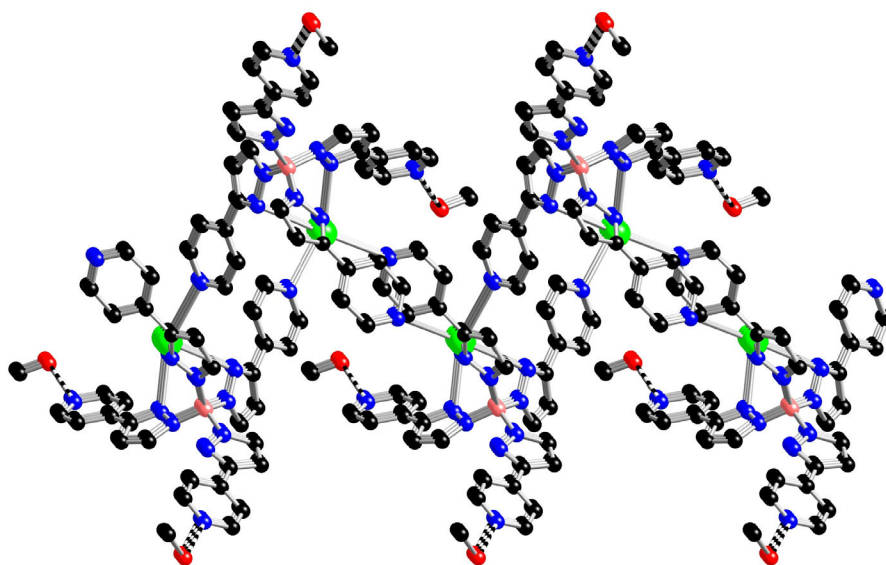

(b)

**Figure S4.** (a) The 2D (4,4) sheet motif in the structure of  $[\text{Tl}(\text{Tkp}^{4\text{py}})] \cdot 2\text{MeOH}$ . For clarity, a complete  $\text{Tkp}^{4\text{py}}$  ligand is shown only at top left (along with the corresponding hydrogen bonded methanol molecules); the rest of the sheet is represented only by the Tl atoms (green), the B atoms (pink), and the 4-pyridylpyrazolyl moieties which bridge the Tl atoms. (b) The same sheet viewed side-on, with all 4-pyridylpyrazolyl groups and methanol molecules shown. Hydrogen bonds are represented by the striped connections.

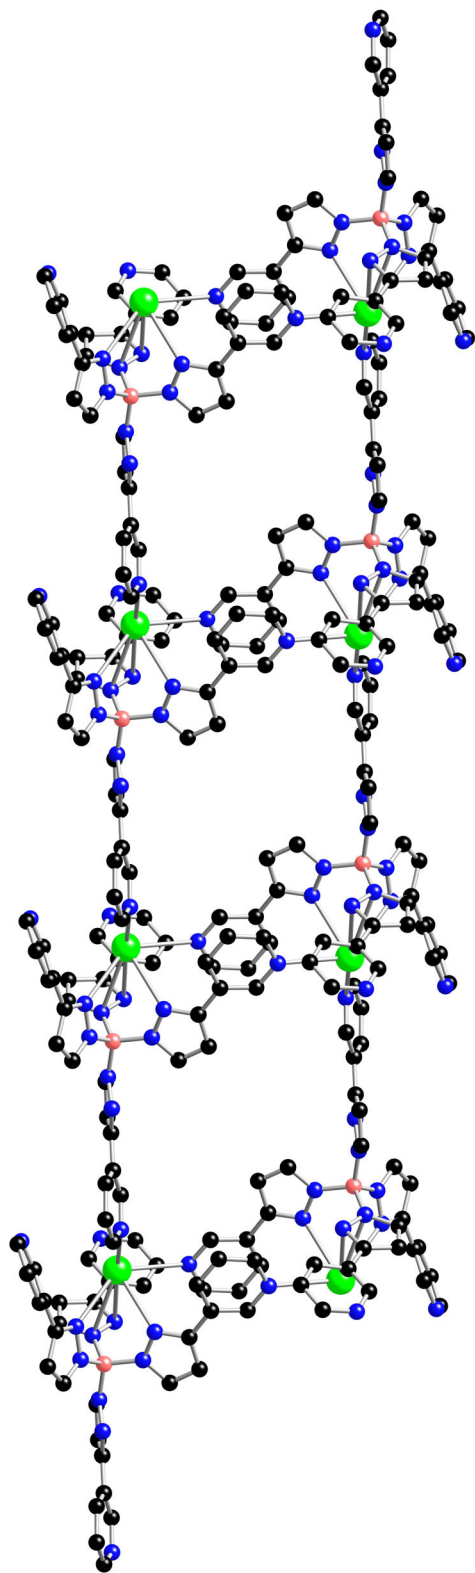

**Figure S5.** The ladder motif in the structure of  $[\text{Tl}(\text{Tkp}^{3\text{py}})].\text{H}_2\text{O}$ .

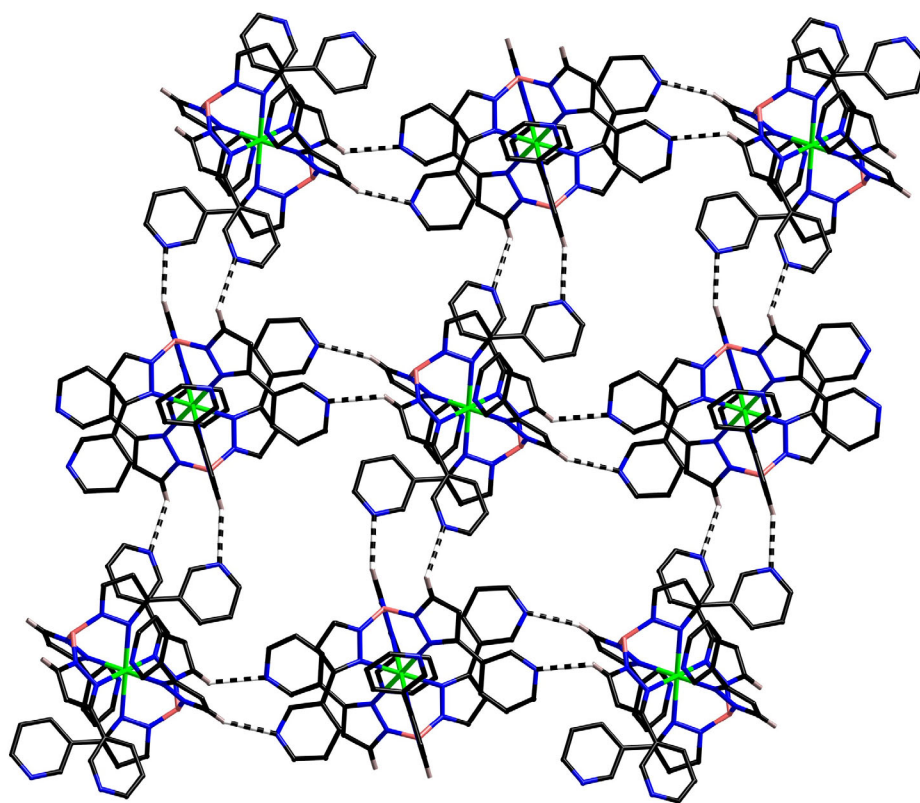

**Figure S6.** The 2D (4,4) sheet motif in the packing structure of  $[\text{Ni}(\text{Tp}^{3\text{py}})_2]$ , as defined by weak C-H...N interactions (striped bonds).
